# Supplementary material
Source: publisher site journal article supplement (https://www.kjim.org/upload/media/kjim-2018-267-suppl3.pdf)
Supplement: Supplementary file 1 [file kjim-2018-267-suppl3.pdf]

**Supplementary Table 3. Predictive factors for recurrent VTE and death from PE**

| Variable                   | Adjusted HR | 95% CI   | p value |
|----------------------------|-------------|----------|---------|
| All patients with PE       |             |          |         |
| Cancer                     | 9.75        | 2.4–39.2 | 0.001   |
| No anticoagulation         | 3.95        | 1.1–11.8 | 0.048   |
| Current smoking            | 5.3         | 1.6–17.3 | 0.006   |
| Bilateral lung involvement | 3.46        | 1.0–11.8 | 0.048   |
| Incidental PE              | 0.1         | 0.0–0.95 | 0.045   |
| Suspected PE               |             |          |         |
| Cancer                     | 8.70        | 2.0–37.4 | 0.004   |
| No anticoagulation         | 7.96        | 2.1–30.5 | 0.002   |
| Current smoking            | 5.94        | 1.8–20.1 | 0.004   |

Adjusted for age, gender, body mass index, cancer, no anticoagulation, duration of treatment, proximal located PE, bilateral lung involvement, shock, tachycardia, hypoxia, smoking, right ventricular dysfunction, unexpected PE, N-terminal pro-blood natriuretic peptide, creatine kinase myocardial band, hemoglobin, and D-dimer.

VTE, venous thromboembolism; PE, pulmonary embolism; HR, hazard ratio; CI, confidence interval.
